# Supplementary material
Source: PubMed Central journal article supplement (PMC3250196)
Supplement: 1113519108_pnas.201113519SI.pdf [file 1113519108_pnas.201113519SI.pdf]

# Supporting Information

Yosef et al. 10.1073/pnas.1113519108

## Supporting Materials and Methods

**Reagents, Strains, and Plasmids.** LB medium (1.0% tryptone, 0.5% yeast extract, 0.5% NaCl) was from Acumedia, agar was from Difco, and antibiotics, isopropyl-beta-D-thiogalactopyranoside (IPTG), L-arabinose, maltose, and MgSO<sub>4</sub> were from Sigma-Aldrich. Restriction enzymes were from New England Biolabs. Rapid ligation kit was from Roche. Bacterial strains, phages, plasmids and oligonucleotides used in this study are listed in Table S1.

**Construction of Transposon-Insertion Library and Selection of Genes Essential for CRISPR Activity.** Conjugation of pRL27-kan plasmid carrying the Tn5 transposon was carried out as follows. A late-exponential culture (OD<sub>600</sub> 0.8) of the recipient strain *E. coli* BW25113Δ*hns* *araB*::T7-RNAP λ*c1857-bla* grown in LB medium with 50 μg/ml ampicillin was mixed with a late-exponential culture (OD<sub>600</sub> 0.8) of the donor strain WM2672 (1) grown in LB medium containing 12 μg/ml kanamycin at a 10:1 recipient-to-donor ratio. The mixed cell suspension was incubated at 32°C for 30 min. Cells were vortexed and plated on LB agar containing 12 μg/ml kanamycin and 50 μg/ml ampicillin. Approximately 50,000 colonies were obtained from repeated conjugations. The pooled cells were supplemented with 10% vol/vol glycerol and stored in aliquots at –80°C. For the selection procedure, these cells were thawed, rendered competent, and transformed with pWUR478. Colonies grown on selection plates supplemented with 35 μg/ml chloramphenicol, 12 μg/ml kanamycin, 100 μg/ml ampicillin, 10 μg/ml tetracycline, 1% L-arabinose and 1 mM IPTG were taken for further studies as candidates for colonies with Tn5 disruption of genes essential for CRISPR function. Screening for *cas*-disrupted colonies and examining transposon insertions in *cas1* or *cas2* were performed using primers P1, P2, P3, KF, KR, Cas1-F, and Cas2-R (Table S1). Further identification of the transposon-insertion site in non-*cas* disrupted colonies was carried out by semi-random two-step PCR as described previously (2).

**Transduction.** Transductions were used to replace specific genes (e.g. *htpG*, *hns*) with antibiotic resistance or for insertion of *araB*::T7-RNAP. P1 lysate was prepared as follows: overnight cultures of the donor strain, either specific clones from the Keio collection (3) or BL21-AI-T7-RNAP::tet (Invitrogen), were diluted 1:100 in 2.5 ml LB medium containing 5 mM CaCl<sub>2</sub> and 0.2% glucose. After 1 h shaking at 37°C, 0 to 100 μl phage P1 was added. Cultures were aerated for 1 to 3 h, until lysis occurred. The obtained P1 lysate was used in transduction, where 100 μl of fresh overnight culture was mixed with 1.25 μl of 1 M CaCl<sub>2</sub> and 0 to 100 μl P1 phage lysate. After incubation for 30 min at 30°C without shaking, 100 μl of 1 M Na-citrate and 500 μl LB medium were added. Cultures were incubated at 37°C for 60 min, then 3 ml of warm LB medium supplemented with 0.7% agar was added and the suspension was poured onto a plate containing the appropriate drug. Transductants obtained on antibiotic plates were streaked several times on selection plates and verified by PCR for the presence of the transduced DNA fragment. In some cases, the kanamycin resistance marker was removed using the flippase recombination enzyme encoded by plasmid pCP20 (4).

**Plasmid Construction.** *htpG* was cloned under the arabinose promoter in plasmid pBAD18. The *htpG* gene was PCR-amplified from MG1655 genomic DNA using primers RE18F and RE18R (Table S1). Amplified DNA was digested by Sall/SacI and ligated into pBAD18 digested with the same restriction enzymes, to yield pBAD-HtpG. pAC-477 and pAC-478 are ampicillin-resistant (amp<sup>r</sup>) pACYC177 derivatives with short CRISPR arrays derived from the cam<sup>r</sup> pWUR477 and pWUR478, respectively. DNA inserts were prepared by PCR amplification of pWUR477 or pWUR478 using oligonucleotides RK8F and RK7R (Table S1). The resulting DNA inserts encode the respective arrays under the T7 promoter, but without the lacO site, and therefore do not require IPTG for induction. The amplified DNAs were digested with HindIII/XhoI and ligated into pACYC177 digested with the same restriction enzymes. All DNA inserts were confirmed by sequencing.

1. Larsen RA, Wilson MM, Guss AM, Metcalf WW (2002) Genetic analysis of pigment biosynthesis in *Xanthobacter autotrophicus* Py2 using a new, highly efficient transposon mutagenesis system that is functional in a wide variety of bacteria. *Arch Microbiol* 178(3):193–201.
2. Walker CB, et al. (2009) The electron transfer system of syntrophically grown *Desulfobivrio vulgaris*. *J Bacteriol* 191(18):5793–5801.

3. Baba T, et al. (2006) Construction of *Escherichia coli* K-12 in-frame, single-gene knockout mutants: the Keio collection. *Mol Syst Biol* 2:1–11.
4. Datsenko KA, Wanner BL (2000) One-step inactivation of chromosomal genes in *Escherichia coli* K-12 using PCR products. *Proc Natl Acad Sci U S A* 97(12):6640–6645.

**Table S1. Bacterial strains, phages, plasmids, and oligonucleotides used in this study**

|                             | Description/sequence                                                                                                                                                                                                                                                                               | Source              |
|-----------------------------|----------------------------------------------------------------------------------------------------------------------------------------------------------------------------------------------------------------------------------------------------------------------------------------------------|---------------------|
| <b>Bacterial strains</b>    |                                                                                                                                                                                                                                                                                                    |                     |
| NEB5 $\alpha$               | F <sup>-</sup> $\phi$ 80 <i>lacZ</i> $\Delta$ M15 $\Delta$ ( <i>lacZYA-argF</i> ) U169 <i>deoR recA1 endA1 hsdR17</i><br>( <i>r<sub>k</sub><sup>-</sup></i> , <i>m<sub>k</sub><sup>+</sup></i> ) <i>gal<sup>-</sup> phoA supE44 <math>\lambda</math><sup>-</sup> thi<sup>-</sup>1 gyrA96 relA1</i> | New England Biolabs |
| BW25113                     | F <sup>-</sup> $\Delta$ ( <i>araD-araB</i> )567 $\Delta$ <i>lacZ4787</i> :: <i>rrnB-3</i> $\lambda$ <sup>-</sup> <i>rph-1</i><br>$\Delta$ ( <i>rhaD-rhaB</i> )568 <i>hsdR514</i>                                                                                                                   | (1)                 |
| IYB5163                     | BW25113 $\Delta$ <i>hns araB</i> ::T7-RNAP-tetA $\lambda$ <i>cl857-kan</i>                                                                                                                                                                                                                         | This study          |
| RE1093                      | BW25113 $\Delta$ <i>hns araB</i> ::T7-RNAP-tetA $\lambda$ <i>cl857-bla</i>                                                                                                                                                                                                                         | This study          |
| IYB5165                     | BW25113 $\Delta$ <i>hns <math>\Delta</math>htpG araB</i> ::T7-RNAP-tetA $\lambda$ <i>cl857-kan</i>                                                                                                                                                                                                 | This study          |
| IYB5237                     | BW25113 <i>araB</i> ::T7-RNAP-tetA $\lambda$ <i>cl857-kan</i>                                                                                                                                                                                                                                      | This study          |
| JW0462                      | BW25113 $\Delta$ <i>htpG</i> :: <i>kan</i>                                                                                                                                                                                                                                                         | (2)                 |
| <b>Phages</b>               |                                                                                                                                                                                                                                                                                                    |                     |
| $\lambda$ vir               | Obligatory lytic                                                                                                                                                                                                                                                                                   | (3)                 |
| $\lambda$ cl857- <i>bla</i> | <i>cl857 s100 nin5, amp<sup>r</sup></i>                                                                                                                                                                                                                                                            | Stratagene          |
| $\lambda$ cl857- <i>kan</i> | <i>cl857, kan<sup>r</sup></i>                                                                                                                                                                                                                                                                      | (4)                 |
| <b>Plasmids</b>             |                                                                                                                                                                                                                                                                                                    |                     |
| pWUR477                     | pACYCDuet-1 (Novagen) cloned with control spacers under T7 promoter, <i>cam<sup>r</sup></i>                                                                                                                                                                                                        | (5)                 |
| pWUR478                     | pACYCDuet-1 (Novagen) cloned with anti $\lambda$ spacers under T7 promoter, <i>cam<sup>r</sup></i>                                                                                                                                                                                                 | (5)                 |
| pAC-477                     | pACYC184-derived, cloned with control spacers under T7 promoter, <i>amp<sup>r</sup></i>                                                                                                                                                                                                            | This study          |
| pAC-478                     | pACYC184-derived, cloned with anti $\lambda$ spacers under T7 promoter, <i>amp<sup>r</sup></i>                                                                                                                                                                                                     | This study          |
| pBAD18                      | Arabinose-inducible expression vector, <i>amp<sup>r</sup></i>                                                                                                                                                                                                                                      | (6)                 |
| pBAD-HtpG                   | pBAD18 cloned with <i>htpG</i> , <i>amp<sup>r</sup></i>                                                                                                                                                                                                                                            | This study          |
| pCA24N-CasA                 | pCA24N cloned with <i>casA</i> , <i>cam<sup>r</sup></i>                                                                                                                                                                                                                                            | (7)                 |
| pCA24N-CasB                 | pCA24N cloned with <i>casB</i> , <i>cam<sup>r</sup></i>                                                                                                                                                                                                                                            | (7)                 |
| pCA24N-CasC                 | pCA24N cloned with <i>casC</i> , <i>cam<sup>r</sup></i>                                                                                                                                                                                                                                            | (7)                 |
| pCA24N-CasD                 | pCA24N cloned with <i>casD</i> , <i>cam<sup>r</sup></i>                                                                                                                                                                                                                                            | (7)                 |
| pCA24N-CasE                 | pCA24N cloned with <i>casE</i> , <i>cam<sup>r</sup></i>                                                                                                                                                                                                                                            | (7)                 |
| pCA24N-Cas3                 | pCA24N cloned with <i>cas3</i> , <i>cam<sup>r</sup></i>                                                                                                                                                                                                                                            | (7)                 |
| pCA24N-HtpG                 | pCA24N cloned with <i>htpG</i> , <i>cam<sup>r</sup></i>                                                                                                                                                                                                                                            | (7)                 |
| pCA24N-CasA-GFP             | pCA24N cloned with <i>casA-gfp</i> , <i>cam<sup>r</sup></i>                                                                                                                                                                                                                                        | (7)                 |
| pCA24N-CasB-GFP             | pCA24N cloned with <i>casB-gfp</i> , <i>cam<sup>r</sup></i>                                                                                                                                                                                                                                        | (7)                 |
| pCA24N-CasC-GFP             | pCA24N cloned with <i>casC-gfp</i> , <i>cam<sup>r</sup></i>                                                                                                                                                                                                                                        | (7)                 |
| pCA24N-CasD-GFP             | pCA24N cloned with <i>casD-gfp</i> , <i>cam<sup>r</sup></i>                                                                                                                                                                                                                                        | (7)                 |
| pCA24N-CasE-GFP             | pCA24N cloned with <i>casE-gfp</i> , <i>cam<sup>r</sup></i>                                                                                                                                                                                                                                        | (7)                 |
| pCA24N-Cas3-GFP             | pCA24N cloned with <i>cas3-gfp</i> , <i>cam<sup>r</sup></i>                                                                                                                                                                                                                                        | (7)                 |
| Oligonucleotides            | 5'→3'                                                                                                                                                                                                                                                                                              |                     |
| RE17F                       | TTAAGAGCTCTTGAGGAAGACCTACATGAAAGGAC                                                                                                                                                                                                                                                                |                     |
| RE17R                       | ATTGTCGACTCAGGAAACCAGCAGCTGGTTC                                                                                                                                                                                                                                                                    |                     |
| RK7R                        | CAGACTCGAGGGTACCCGCTC                                                                                                                                                                                                                                                                              |                     |
| RK8F                        | GATAAAGCTTGAAATTAATACGACTCACTATAGGGAGAGGAAACAAAGAATTAGCTGATC                                                                                                                                                                                                                                       |                     |
| P1                          | TTTGGGATTTGCAGGGATGAC                                                                                                                                                                                                                                                                              |                     |
| P2                          | CTTCAGCTGGCGGCCGCGCGCCTCGCCATTATTACGAA                                                                                                                                                                                                                                                             |                     |
| P3                          | CTTCAGCTGGCGGCCGCGGGCTACTCCGATGGCCTGCAT                                                                                                                                                                                                                                                            |                     |
| KF                          | ACCTACAACAAAGCTCTCATCAACC                                                                                                                                                                                                                                                                          |                     |
| KR                          | GCAATGTAACATCAGAGATTTTGAG                                                                                                                                                                                                                                                                          |                     |
| Cas1-F                      | GGGCTAGCGAATTCGAGCTC GCTCCACTGTGATTGAGGTG                                                                                                                                                                                                                                                          |                     |
| Cas2-R                      | CATCACCTTTGGCTTCGGCTG                                                                                                                                                                                                                                                                              |                     |

- Datsenko KA, Wanner BL (2000) One-step inactivation of chromosomal genes in *Escherichia coli* K-12 using PCR products. *Proc Natl Acad Sci U S A* 97(12):6640–6645.
- Baba T, et al. (2006) Construction of *Escherichia coli* K-12 in-frame, single-gene knockout mutants: the Keio collection. *Mol Syst Biol* 2:1–11.
- Jacob F, Fuerst R, Wollman EL (1957) [Defective lysogenic bacteria. II. Physiological types resulting from prophage mutations]. *Ann Inst Pasteur (Paris)* 93(6):724–753.
- Edgar R, Qimron U (2010) The *Escherichia coli* CRISPR system protects from lambda lysogenization, lysogens, and prophage induction. *J Bacteriol* 192(23):6291–6294.
- Brouns SJ, et al. (2008) Small CRISPR RNAs guide antiviral defense in prokaryotes. *Science* 321(5891):960–964.
- Guzman LM, Belin D, Carson MJ, Beckwith J (1995) Tight regulation, modulation, and high-level expression by vectors containing the arabinose PBAD promoter. *J Bacteriol* 177(14):4121–4130.
- Kitagawa M, et al. (2005) Complete set of ORF clones of *Escherichia coli* ASKA library (A Complete Set of *E. coli* K-12 ORF Archive): Unique Resources for Biological Research. *DNA Res* 12(5):291–299.
